# Supplementary material for: Unravelling the cooperative role of lattice strain on MnO2/TiO2 and MnO2/ZnO catalysts for the fast decomposition of hydrogen peroxide
Source: Royal Society of Chemistry journal article supplement (doi:10.1039/d1nj00499a), 2021-01-01
Supplement: d1nj00499a1.pdf [file d1nj00499a1.pdf]

## Electronic supplementary information for

### Unravelling the cooperative role of lattice strain on MnO<sub>2</sub>/TiO<sub>2</sub> and MnO<sub>2</sub>/ZnO catalysts for fast decomposition of hydrogen peroxide

D. Santharaj<sup>a\*</sup>, A. Selvamani<sup>b</sup>, K. Rajakumar<sup>c</sup>, N. Ricky Joseph<sup>a</sup>, S. Giridhar<sup>a</sup>, T. Adinaveen<sup>a</sup>, P. Leema Sophie<sup>a</sup>, V. Ramkumar<sup>d</sup>

- [a] Prof. D. Santharaj, Prof. T. Adinaveen and Prof. P. Leema Sophie  
Department of Chemistry, Loyola College,  
Chennai, Tamilnadu 600 034, India.  
E-mail: [santharaj@loyolacollege.edu](mailto:santharaj@loyolacollege.edu)
- [a] Mr. N. Ricky Joseph and Mr. S. Giridhar  
Department of Chemistry, Loyola College,  
Chennai, Tamilnadu 600 034, India
- [a] Mr. S. Giridhar  
Department of Chemistry, Loyola College,  
Chennai, Tamilnadu 600 034, India
- [b] Catalytic Reforming Area, Light Stock Processing Division,  
CSIR- Indian Institute of Petroleum  
Dehradun-248 005, Uttarakhand, India.
- [c] Nanotechnology Research & Education Centre  
South Ural State University, Chelyabinsk - 454080, Russia
- [d] Dr. V. Ramkumar  
Department of Polymer Science and Technology,  
(CSIR) – Central Research Laboratory,  
Adyar, Chennai, Tamilnadu 600 020, India.

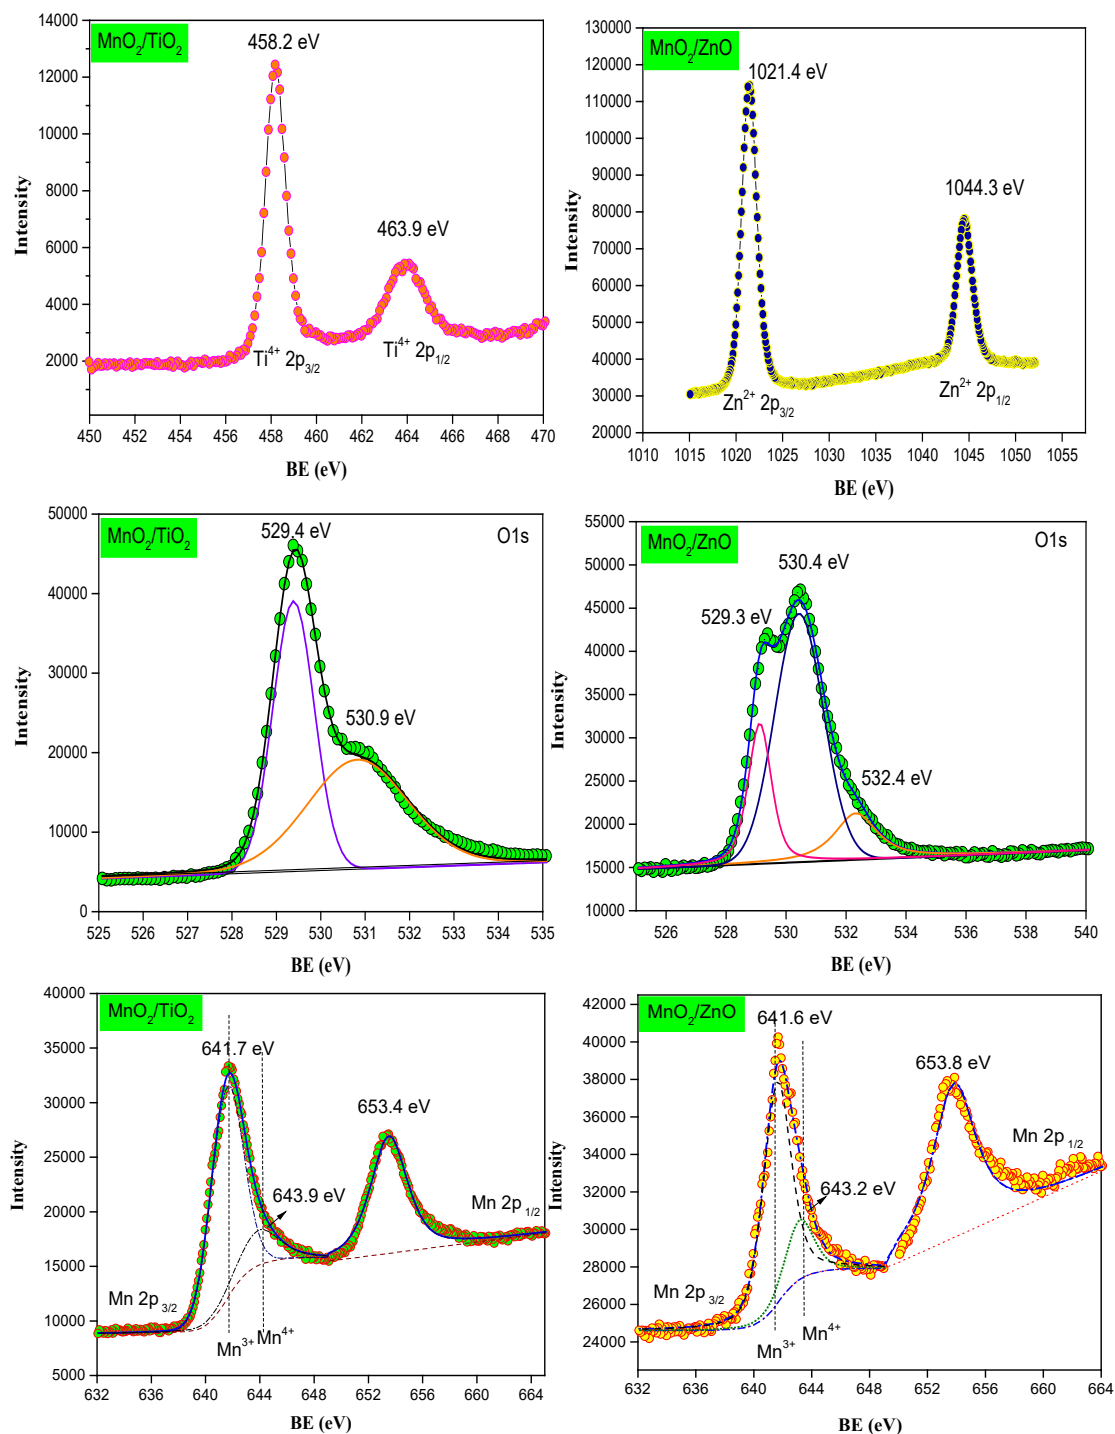

**Figure S1** XPS spectra of MnO<sub>2</sub> loaded on TiO<sub>2</sub> and ZnO catalysts

The XPS spectra showing the O 1s signal of MnO<sub>2</sub> loaded on ZnO catalyst at three different binding energy values such as 529.3, 530.4, and 532.4 eV, respectively. The first peak assigned

to the surface lattice oxygen ( $O_{\text{latt}}$ ), and the second peak can be attributed to the surface adsorbed oxygen ( $O_{\text{ads}}$ ), and the final peak was developed mainly due to the adsorbed molecular water species ( $O_{\text{H}_2\text{O}}$ ).<sup>1-3</sup> However, in the case of the  $\text{TiO}_2$  catalyst, the surface adsorbed oxygen contribution was significantly less due to fewer interaction sites of  $\text{TiO}_2$  lattice. Further, the oxidation states of  $\text{Ti}^{4+}$  and  $\text{Zn}^{2+}$  were identified from their respective XPS peak positions, as shown in Figure S1.

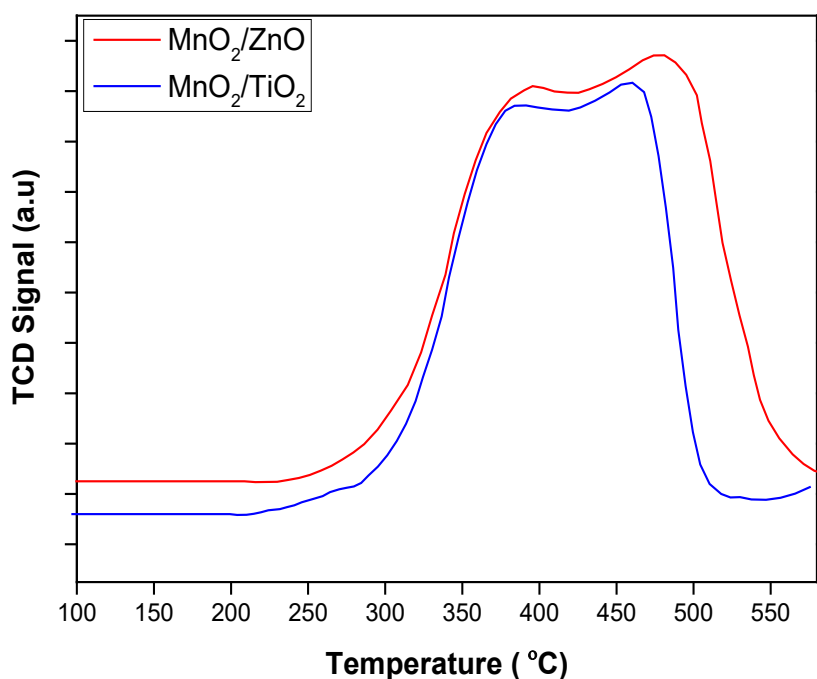

**Figure S2** H<sub>2</sub>-TPR results of synthesised catalysts

### Catalytic activity

**Table S1** Quantitative relationship between lattice strain and catalytic activity.

| Catalysts                       | Strain $\epsilon$<br>( $10^{-3}$ ) | Stress $\sigma$<br>(MPa) | TOF ( $\text{sec}^{-1}$ ) |
|---------------------------------|------------------------------------|--------------------------|---------------------------|
| 10% $\text{MnO}_2/\text{TiO}_2$ | 0.417                              | 52.96                    | 187.2                     |
| 20% $\text{MnO}_2/\text{TiO}_2$ | 0.486                              | 65.86                    | 193.6                     |
| 30% $\text{MnO}_2/\text{TiO}_2$ | 0.398                              | 49.65                    | 62.4                      |
| 40% $\text{MnO}_2/\text{TiO}_2$ | 0.395                              | 49.89                    | 56.8                      |
| 50% $\text{MnO}_2/\text{TiO}_2$ | 0.397                              | 49.87                    | 56.4                      |

### References

1. K. S. Kim, *Phys. Rev. B: Solid State* 1975, **11**, 2177– 2185.
2. T. A. Patterson, J. C. Carver, D. E. Leyden, D. M. Hercules, *J. Phys. Chem.* 1976, **80**, 1700–1708.
3. Z. Li, H. Wang, X. Wu, Q. Ye, X. Xu, B. Li, F. Wang, *Appl. Surf. Sci.* 2017, **403**, 335–341.
